# Supplementary material for: Effects of Low Dose Space Radiation Exposures on the Splenic Metabolome
Source: PubMed Central journal article supplement (PMC8002539; doi:10.3390/ijms22063070), 2021-03-17
Supplement: ijms-22-03070-s001.pdf [file ijms-22-03070-s001.pdf]

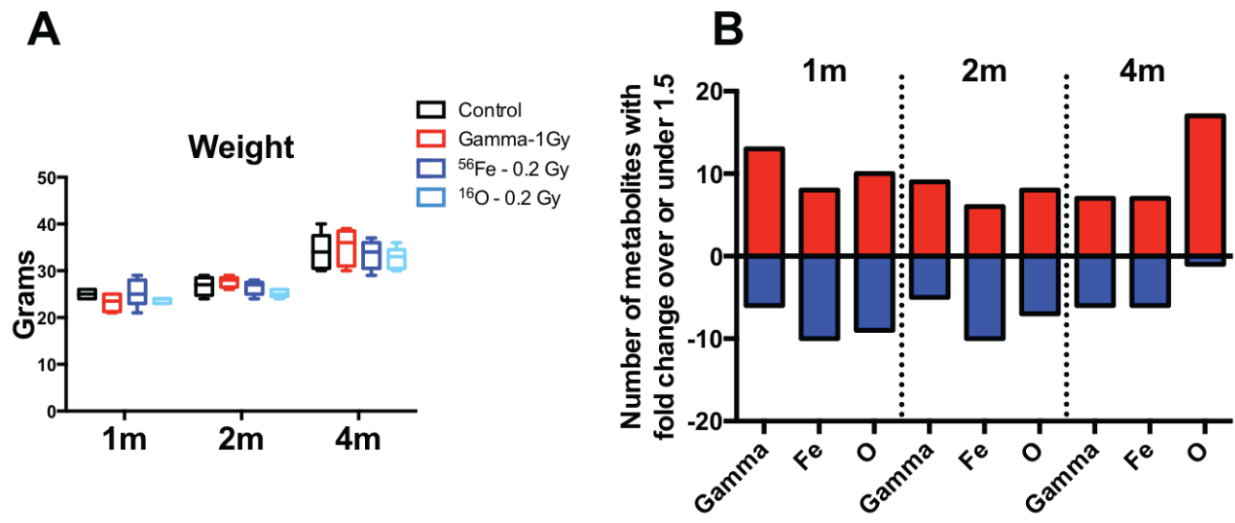

**Supplementary Figure S1.** Panel (A) Weight of mice in grams (box and whisker plots), Panel (B) The number of metabolites showing a fold change of >1.5 or <1.5 relative to controls at each time point.

**Supplementary Table S1.** Chromatographic and mass spectrometry conditions.

| Chromatographic conditions for untargeted metabolomics |                                   |               |     |     |    |               | Other parameters for tissue analysis: |                               |                                  |
|--------------------------------------------------------|-----------------------------------|---------------|-----|-----|----|---------------|---------------------------------------|-------------------------------|----------------------------------|
|                                                        |                                   |               |     |     |    |               | <b>Instrument</b>                     | <b>UPLC TOFMS Xevo G2</b>     |                                  |
|                                                        |                                   |               |     |     |    |               | <b>Parameter</b>                      |                               |                                  |
| Step                                                   | Time (min)                        | Flow (mL/min) | % A | % B | %D | Curve Initial | Autosampler                           | Injection volume $\mu$ L      | 2                                |
| 1                                                      | Initial                           | 0.4           | 97  | 3   | 0  | 6             | Column Oven                           | Temperature $^{\circ}$ C      | 60                               |
| 2                                                      | 0.5                               | 0.4           | 97  | 3   | 0  | 6             |                                       | Column                        | ACQUITY UPLC BEH C18 1.7 $\mu$ m |
| 3                                                      | 4                                 | 0.4           | 40  | 60  | 0  | 6             |                                       |                               |                                  |
| 4                                                      | 8                                 | 0.4           | 2   | 98  | 0  | 6             | MS                                    | Capillary Voltage kV          | 3                                |
| 5                                                      | 9                                 | 0.4           | 0   | 5   | 95 | 6             | MSe function                          | Cone Voltage V                | 30                               |
| 6                                                      | 10                                | 0.4           | 0   | 5   | 95 | 6             |                                       | Source Temp $^{\circ}$ C      | 120                              |
| 7                                                      | 11                                | 0.4           | 25  | 25  | 50 | 6             |                                       | Desolvation Temp $^{\circ}$ C | 500                              |
| 8                                                      | 13                                | 0.4           | 97  | 3   | 0  | 6             |                                       | Cone Gas Flow (L/Hr)          | 25                               |
| Solvent A:                                             | Water+0.1% Formic acid            |               |     |     |    |               |                                       | Desolvation Gas (L/Hr)        | 1000                             |
| Solvent B:                                             | Acetonitrile+0.1% Formic acid     |               |     |     |    |               |                                       | Collision Energy V            | 6                                |
| Solvent D:                                             | IPA/ACN 90/10+0.1%FA+10mM HCOONH4 |               |     |     |    |               |                                       |                               |                                  |

**Supplementary Table S2.** Data for regression analysis.

| Gamma_d | Fe_dos | O_dos | Time_m | Fatty_acids | Purine_metaboli | Purine_metabolis | Acylcarnitines | Energy_metab |
|---------|--------|-------|--------|-------------|-----------------|------------------|----------------|--------------|
| ose_Gy  | e_Gy   | e_Gy  | onths  | _Mean       | sm_Mean_A       | m_Mean_B         | _Mean          | olism_Mean   |
| 0       | 0      | 0     | 1      | 10.8040468  | 8.128608418     | 9.562662415      | 11.43369065    | 10.83183084  |
| 0       | 0      | 0     | 1      | 10.7481201  | 7.579494031     | 9.44291115       | 10.54704029    | 10.33865232  |
| 0       | 0      | 0     | 1      | 10.8097759  | 7.596729949     | 9.614818974      | 11.11737712    | 10.67757462  |
| 0       | 0      | 0     | 1      | 10.9668432  | 7.62363612      | 9.674623038      | 11.0920235     | 10.59304813  |
| 1       | 0      | 0     | 1      | 10.355432   | 8.535555718     | 9.024640589      | 11.68652919    | 10.60303475  |
| 1       | 0      | 0     | 1      | 10.3738427  | 8.833018255     | 9.307780351      | 11.52807426    | 10.91635687  |
| 1       | 0      | 0     | 1      | 10.4749974  | 8.602450302     | 9.201540896      | 11.52195862    | 10.53708495  |
| 1       | 0      | 0     | 1      | 10.8249563  | 8.690100037     | 9.231952295      | 11.29115922    | 10.72150046  |
| 1       | 0      | 0     | 1      | 10.8281189  | 8.802899547     | 9.334996929      | 11.41427508    | 10.63055824  |
| 0       | 0.2    | 0     | 1      | 10.5863273  | 7.300667562     | 9.897969517      | 10.64282223    | 10.564966    |
| 0       | 0.2    | 0     | 1      | 10.5987557  | 8.022781962     | 8.791637826      | 10.03748289    | 10.56185937  |
| 0       | 0.2    | 0     | 1      | 10.814802   | 8.137578223     | 8.976491664      | 10.40967712    | 10.78674594  |
| 0       | 0.2    | 0     | 1      | 10.9767536  | 8.346595672     | 9.067092197      | 11.03901735    | 10.76025725  |
| 0       | 0.2    | 0     | 1      | 10.8179711  | 8.26979918      | 9.044496135      | 10.49314057    | 10.67677226  |
| 0       | 0      | 0.2   | 1      | 10.5867382  | 7.851671708     | 9.626676755      | 11.36674996    | 10.62269888  |
| 0       | 0      | 0.2   | 1      | 10.7459898  | 8.607617402     | 9.310967357      | 10.70451813    | 10.82529907  |
| 0       | 0      | 0.2   | 1      | 10.7166449  | 8.368210473     | 9.167671423      | 11.01318562    | 10.62321335  |
| 0       | 0      | 0.2   | 1      | 10.6994047  | 8.188580683     | 9.041445391      | 10.67428603    | 10.84029518  |
| 0       | 0      | 0.2   | 1      | 11.0641364  | 8.00220368      | 9.479024854      | 10.79885503    | 10.66328288  |
| 0       | 0      | 0     | 2      | 10.3453662  | 8.37500882      | 8.967809489      | 11.75138736    | 10.6408052   |
| 0       | 0      | 0     | 2      | 11.2658213  | 8.042493662     | 8.614389904      | 10.51233144    | 10.17994201  |
| 0       | 0      | 0     | 2      | 10.7822935  | 8.28033659      | 9.07762497       | 11.24742428    | 10.6845552   |
| 0       | 0      | 0     | 2      | 10.7663332  | 8.291339633     | 9.039678256      | 11.38313318    | 10.52668139  |
| 1       | 0      | 0     | 2      | 9.87952342  | 8.540332885     | 9.155860537      | 11.35436603    | 10.42855477  |
| 1       | 0      | 0     | 2      | 10.3072769  | 8.598087353     | 9.599208302      | 11.39289671    | 10.60545932  |
| 1       | 0      | 0     | 2      | 9.89282263  | 8.634604935     | 9.583343122      | 11.32435871    | 10.59655257  |
| 1       | 0      | 0     | 2      | 10.5076806  | 8.052110575     | 9.595240463      | 11.2597144     | 10.7718183   |

|   |     |     |   |            |             |             |             |             |
|---|-----|-----|---|------------|-------------|-------------|-------------|-------------|
| 1 | 0   | 0   | 2 | 10.5204125 | 8.773303929 | 9.345954905 | 11.32310381 | 10.87931666 |
| 0 | 0.2 | 0   | 2 | 10.6125417 | 6.193109417 | 9.369168235 | 10.91895019 | 10.48020492 |
| 0 | 0.2 | 0   | 2 | 10.7711549 | 6.776226112 | 9.517329658 | 11.00306224 | 10.50951805 |
| 0 | 0.2 | 0   | 2 | 10.7655321 | 8.152977271 | 9.161538487 | 10.67727669 | 10.78621382 |
| 0 | 0.2 | 0   | 2 | 11.0066724 | 7.971310262 | 9.424066076 | 11.12946935 | 10.61534419 |
| 0 | 0.2 | 0   | 2 | 10.9184113 | 8.149240016 | 9.452828624 | 11.18778671 | 10.60574146 |
| 0 | 0   | 0.2 | 2 | 10.4381425 | 8.12272208  | 9.484963967 | 10.75042568 | 10.81130305 |
| 0 | 0   | 0.2 | 2 | 11.2008312 | 7.829240108 | 8.734871682 | 10.50198913 | 10.44330126 |
| 0 | 0   | 0.2 | 2 | 11.344846  | 7.920124271 | 9.607559676 | 11.28792395 | 10.90045636 |
| 0 | 0   | 0.2 | 2 | 11.4647614 | 7.837612657 | 9.141685971 | 10.70973678 | 10.55345142 |
| 0 | 0   | 0.2 | 2 | 11.0096453 | 8.158543483 | 9.283304934 | 10.56441553 | 10.76125549 |
| 0 | 0   | 0   | 4 | 10.9736129 | 7.570673765 | 9.237763286 | 10.24679705 | 9.984723647 |
| 0 | 0   | 0   | 4 | 11.1468909 | 8.632823486 | 9.228770287 | 10.96230883 | 10.71177432 |
| 0 | 0   | 0   | 4 | 11.2254005 | 8.202961651 | 9.441304909 | 10.87928503 | 10.8360947  |
| 0 | 0   | 0   | 4 | 11.0978708 | 8.213058771 | 9.267442472 | 10.53675742 | 10.79071204 |
| 0 | 0   | 0   | 4 | 11.0972787 | 8.072195994 | 9.449968446 | 10.95798283 | 10.83233124 |
| 1 | 0   | 0   | 4 | 10.9691189 | 8.029222335 | 9.573184274 | 11.01665386 | 10.70045199 |
| 1 | 0   | 0   | 4 | 11.257311  | 6.9110316   | 9.492110484 | 11.07438138 | 10.55588536 |
| 1 | 0   | 0   | 4 | 11.2903529 | 7.706396063 | 9.492092364 | 11.029805   | 10.56242314 |
| 1 | 0   | 0   | 4 | 10.7882953 | 8.057877872 | 9.466936974 | 10.99197526 | 10.70087069 |
| 1 | 0   | 0   | 4 | 11.1755684 | 7.985821509 | 9.745874942 | 11.15360529 | 10.77409646 |
| 0 | 0.2 | 0   | 4 | 10.6940488 | 8.422263545 | 9.311023776 | 11.28459118 | 10.52833755 |
| 0 | 0.2 | 0   | 4 | 10.7968586 | 8.100787805 | 9.412487405 | 11.25230157 | 10.59802712 |
| 0 | 0.2 | 0   | 4 | 10.9718824 | 8.171376775 | 9.241224416 | 10.89917672 | 10.53692939 |
| 0 | 0.2 | 0   | 4 | 11.2556145 | 7.702745564 | 9.177933559 | 11.24564699 | 10.53548203 |
| 0 | 0.2 | 0   | 4 | 10.9547265 | 7.637181404 | 9.110590705 | 11.31376951 | 10.24467109 |
| 0 | 0   | 0.2 | 4 | 10.3011824 | 6.371699373 | 10.37214894 | 11.00494429 | 10.77646163 |
| 0 | 0   | 0.2 | 4 | 11.6930345 | 8.975685568 | 9.475438974 | 11.52582287 | 10.85392059 |
| 0 | 0   | 0.2 | 4 | 11.4362347 | 9.028515028 | 9.727041486 | 11.6174915  | 10.93599983 |
| 0 | 0   | 0.2 | 4 | 11.676015  | 8.895628029 | 9.804430041 | 11.37202741 | 10.99913881 |
| 0 | 0   | 0.2 | 4 | 10.9919912 | 8.86421488  | 9.468087601 | 11.28597432 | 10.91431742 |

---

**Supplementary Table S3.**

Month 1 results.

| Metabolite              | FDR<br>corrected<br>ANOVA<br>p-value | Control - 1m      |                  | Gamma - 1m         |                 |                        | Fe - 1m            |                | Log2<br>Fold<br>Change | O - 1m             |                | Log2<br>Fold<br>Change |
|-------------------------|--------------------------------------|-------------------|------------------|--------------------|-----------------|------------------------|--------------------|----------------|------------------------|--------------------|----------------|------------------------|
|                         |                                      | Mean              | SEM              | Mean               | SEM             | Log2<br>Fold<br>Change | Mean               | SEM            |                        | Mean               | SEM            |                        |
| Docosahexaenoic acid    | 0.001162<br>6                        | 107234.<br>2      | 3532.<br>5       | 78596.6<br>9       | 8982.<br>9      | -0.45                  | 54885.2<br>3       | 6084.<br>3     | -0.97                  | 60750.9<br>9       | 5061.<br>9     | -0.82                  |
| Phenylalanine           | 0.012339                             | 118295.<br>8      | 9912.<br>3       | 83577.1<br>8       | 4359.<br>8      | -0.50                  | 64510.5<br>.3      | 12524<br>1026. | -0.87                  | 68742.0<br>3       | 8415.<br>1358. | -0.78                  |
| Guanosine monophosphate | 0.048582                             | 9092.8<br>0       | 14404.8<br>743.1 | 0.66               | 9865.3<br>3     | 0.12                   | 9918.0<br>3        | 0.12           | 9918.0<br>3            | 0.13               | 9918.0<br>3    | 0.13                   |
| Xanthine                | NS                                   | 2108.7<br>150.6   | 2341.0<br>141.2  | 0.15               | 1929.6<br>643.6 | -0.13                  | 1986.9<br>483.2    | -0.13          | 1986.9<br>483.2        | -0.09              | 483.2<br>-0.09 | -0.09                  |
| Oleoylcarnitine         | 0.001262<br>1                        | 377844.<br>3      | 70942<br>.7      | 1044120<br>.7      | 75186<br>.2     | 1.47                   | 545627.<br>6       | 88931<br>.0    | 0.53                   | 583303.<br>3       | 90854<br>.5    | 0.63                   |
| Guanine                 | NS                                   | 29901.6<br>2      | 22376.2<br>5     | -0.42              | 24947.9<br>8    | -0.26                  | 26780.9<br>0       | -0.26          | 26780.9<br>0           | -0.16              | 26780.9<br>0   | -0.16                  |
| Glycerophosphocholine   | 0.004689<br>5                        | 9693.0<br>366093. | 1561.<br>9587.   | 31513.9<br>499698. | 2809.<br>25409  | 1.70                   | 24602.2<br>349477. | 3765.<br>40549 | 1.34                   | 26367.3<br>420233. | 3338.<br>41137 | 1.44                   |
| Acetylcarnitine         | 0.042288                             | 7<br>5            | 2<br>.0          | 0.45               | 7<br>.2         | 0.45                   | 7<br>.2            | 0.45           | -0.07                  | 8<br>.9            | 0.20           | 0.20                   |
| Octanoylcarnitine       | 5.35E-06                             | 145.9<br>145.9    | 13378.5<br>9     | 6.52               | 2019.7<br>875.7 | 3.79                   | 1148.5<br>541.2    | 3.79           | 1148.5<br>541.2        | 2.98               | 2.98           | 2.98                   |

|                                |          |         |        |         |        |       |         |        |       |         |        |       |       |
|--------------------------------|----------|---------|--------|---------|--------|-------|---------|--------|-------|---------|--------|-------|-------|
| Arginine                       | 0.004689 | 7257.   | 2734.  | 6415.   | 6085.  |       |         |        |       |         |        |       |       |
|                                | 5        | 72803.4 | 5      | 59731.7 | 6      | -0.29 | 35751.6 | 5      | -1.03 | 41928.0 | 5      | -0.80 |       |
|                                |          | 555338. | 42877  | 526811. | 37508  |       | 411212. | 59401  | -0.43 | 527429. | 57212  |       |       |
| Carnitine                      | NS       | 9       | .4     | 1       | .3     | -0.08 | 6       | .4     |       | 9       | .9     | -0.07 |       |
| N6,N6,N6-Trimethyl-L-lysine    | 0.000939 | 04      | 4772.4 | 800.7   | 5727.1 | 527.3 | 0.26    | 1997.0 | 336.2 | -1.26   | 2443.7 | 396.8 | -0.97 |
|                                |          | 367493. | 24779  | 320911. | 29445  |       | 306224. | 49418  | -0.26 | 371654. | 34894  |       |       |
| Taurine (pos mode)             | 0.025201 | 6       | .2     | 7       | .7     | -0.20 | 2       | .7     |       | 8       | .3     | 0.02  |       |
|                                | 0.005088 | 8       | 2067.9 | 319.8   | 702.2  | 311.3 | -1.56   | 400.7  | 178.0 | -2.37   | 591.5  | 208.5 | -1.81 |
| Cytidine                       |          |         | 2346.  |         |        | 2862. |         |        |       |         |        | 4441. |       |
| Alpha-linolenic acid           | 0.048102 | 8321.7  | 0      | 8179.3  | 7      | -0.02 | 21057.7 | 2      | 1.34  | 14886.1 | 8      | 0.84  |       |
|                                |          |         | 2008.  |         |        |       |         | 5165.  | -0.75 |         | 2429.  |       |       |
| Inosine                        | NS       | 26147.8 | 6      | 12042.3 | 770.4  | -1.12 | 15519.7 | 1      |       | 18495.8 | 0      | -0.50 |       |
|                                | 0.000285 |         | 1947.  |         |        |       |         | 1871.  | -1.35 |         |        |       |       |
| Hypoxanthine                   | 13       | 18053.2 | 2      | 4647.3  | 600.3  | -1.96 | 7097.9  | 2      |       | 9014.4  | 698.7  | -1.00 |       |
| AMP                            | 7.49E-08 | 1024.7  | 773.0  | 14949.9 | 648.4  | 3.87  | 3254.5  | 881.4  | 1.67  | 2826.3  | 527.0  | 1.46  |       |
|                                | 0.000939 |         | 1801.  |         | 7222.  |       |         | 3896.  | 0.94  |         | 2734.  |       |       |
| Hexanoylcarnitine              | 04       | 8959.2  | 0      | 46153.7 | 3      | 2.37  | 17186.2 | 8      |       | 15343.3 | 6      | 0.78  |       |
|                                |          | 152988. | 7882.  | 144826. | 3366.  |       | 125387. | 15123  | -0.29 | 145906. | 12774  |       |       |
| Niacinamide                    | NS       | 1       | 4      | 8       | 0      | -0.08 | 4       | .8     |       | 5       | .0     | -0.07 |       |
|                                |          |         | 1719.  |         | 1328.  |       |         | 2398.  | -0.66 |         | 1528.  |       |       |
| Pipecolic acid                 | 0.016862 | 22160.8 | 8      | 20664.7 | 5      | -0.10 | 14037.0 | 2      |       | 13939.7 | 4      | -0.67 |       |
| Docosapentaenoic acid          | 0.001739 |         | 3998.  |         | 2055.  |       |         | 3463.  | -1.01 |         | 4078.  |       |       |
|                                | 9        | 55399.9 | 0      | 35802.4 | 1      | -0.63 | 27508.3 | 3      |       | 35637.4 | 3      | -0.64 |       |
| Glutathione reduced (pos mode) | 0.002527 | 203942. | 7270.  | 425981. | 19865  |       | 258949. | 46547  | 0.34  | 255271. | 28688  |       |       |
|                                | 2        | 3       | 3      | 6       | .8     | 1.06  | 7       | .6     |       | 8       | .4     | 0.32  |       |
|                                |          |         | 10454  |         | 5574.  |       |         | 5961.  | -0.28 |         | 6763.  |       |       |
| Citric acid                    | NS       | 91779.3 | .3     | 81808.4 | 9      | -0.17 | 75696.4 | 2      |       | 81232.7 | 9      | -0.18 |       |

|                                |          |         |       |         |       |       |         |       |       |         |       |       |
|--------------------------------|----------|---------|-------|---------|-------|-------|---------|-------|-------|---------|-------|-------|
| Erythronic acid                | 0.004086 |         | 9751. |         | 3969. |       | 4820.   |       | 6734. |         |       |       |
|                                | 5        | 82235.3 | 9     | 41881.6 | 6     | -0.97 | 56170.0 | 0     | -0.55 | 76778.4 | 1     | -0.10 |
| Eicosapentaenoic acid          | NS       | 24753.7 | 1550. | 23541.0 | 2     | -0.07 | 34052.4 | 8     | 0.46  | 35090.5 | 9     | 0.50  |
|                                |          |         | 1157. |         |       |       |         | 2321. |       |         |       |       |
| Histidine                      | NS       | 10382.5 | 2     | 10820.4 | 430.0 | 0.06  | 10715.4 | 9     | 0.05  | 9057.5  | 740.3 | -0.20 |
|                                |          |         | 3442. |         | 4286. |       |         |       |       |         | 1115. |       |
| Lactic acid                    | 0.012339 | 25743.1 | 2     | 40128.3 | 7     | 0.64  | 25976.3 | 904.8 | 0.01  | 27991.0 | 1     | 0.12  |
|                                |          |         | 3945. |         | 5647. |       |         | 1176. |       |         | 1161. |       |
| Uric acid                      | 0.022237 | 22408.6 | 6     | 39692.2 | 9     | 0.82  | 25825.1 | 4     | 0.20  | 24217.3 | 2     | 0.11  |
| Taurine (neg mode)             | NS       | 1003060 | 90297 | 1096304 | 53741 |       | 1125574 | 71676 | 0.17  | 1348918 | 50086 |       |
|                                |          | .7      | .0    | .8      | .2    | 0.13  | .4      | .8    |       | .1      | .1    | 0.43  |
| ADP                            | 0.016853 | 1975.5  | 588.3 | 5055.5  | 692.0 | 1.36  | 1980.4  | 504.0 | 0.00  | 3319.7  | 641.1 | 0.75  |
| Fructose-6-phosphate           | 0.000258 |         | 11610 |         | 1931. |       |         | 2297. |       |         | 3454. |       |
|                                | 66       | 64033.7 | .6    | 8996.3  | 8     | -2.83 | 23603.2 | 3     | -1.44 | 27976.2 | 1     | -1.19 |
| Adenine                        | NS       | 1171.8  | 139.2 | 1643.2  | 168.2 | 0.49  | 1636.7  | 196.3 | 0.48  | 1436.4  | 234.3 | 0.29  |
|                                |          |         | 2093. |         | 4781. |       |         | 2065. |       |         | 2045. |       |
| Succinate                      | 7.07E-05 | 5148.2  | 2     | 41983.6 | 4     | 3.03  | 19984.8 | 7     | 1.96  | 16777.6 | 7     | 1.70  |
| Serine                         | NS       | 1585.6  | 227.8 | 1069.7  | 153.6 | -0.57 | 1075.2  | 76.6  | -0.56 | 1132.0  | 149.9 | -0.49 |
|                                | 0.000134 |         | 1196. |         | 3088. |       |         | 1190. |       |         | 1280. |       |
| UMP                            | 66       | 3956.5  | 2     | 24446.4 | 8     | 2.63  | 9547.9  | 3     | 1.27  | 8703.5  | 1     | 1.14  |
| Ribulose-5-phosphate           | NS       | 4502.3  | 909.4 | 4778.5  | 823.6 | 0.09  | 4971.5  | 5     | 0.14  | 6953.7  | 7     | 0.63  |
|                                |          | 195108. | 21636 | 154891. | 11853 |       | 169975. | 11909 |       | 189271. | 12715 |       |
| Malic acid                     | NS       | 8       | .9    | 9       | .9    | -0.33 | 1       | .3    | -0.20 | 6       | .0    | -0.04 |
|                                |          | 306753. | 22687 | 227611. | 15061 |       | 263115. | 24962 |       | 271088. | 16160 |       |
| Arachidonic acid               | NS       | 6       | .5    | 2       | .3    | -0.43 | 0       | .3    | -0.22 | 5       | .7    | -0.18 |
| Glutathione reduced (neg mode) | 0.000222 | 95186.7 | .1    | 5       | .5    | 1.89  | 8       | .8    | 0.61  | 109685. | 28905 | 0.20  |
|                                |          |         | 11556 | 353154. | 20636 |       | 145182. | 38856 |       |         |       |       |

**Supplementary Table S4.**

Month 2 results.

| Metabolite              | FDR<br>corrected<br>ANOVA<br>p-value | Control - 1m     |                  | Gamma - 1m         |                | Log2<br>Fold<br>Change | Fe - 1m            |                  | Log2<br>Fold<br>Change | O - 1m             |                  | Log2<br>Fold<br>Change |
|-------------------------|--------------------------------------|------------------|------------------|--------------------|----------------|------------------------|--------------------|------------------|------------------------|--------------------|------------------|------------------------|
|                         |                                      | Mean             | SEM              | Mean               | SEM            |                        | Mean               | SEM              |                        | Mean               | SEM              |                        |
| Docosahexaenoic acid    | NS                                   | 57017.<br>2      | 5330.7           | 46148.5            | 4              | -0.31                  | 65398.4            | 6846.5           | 0.20                   | 72170.2            | 8497.3           | 0.34                   |
| Phenylalanine           | NS                                   | 74129.<br>8      | 12563.<br>0      | 74241.6            | 5              | 0.00                   | 64952.9            | 7947.2           | -0.19                  | 67478.0            | 2                | -0.14                  |
| Guanosine monophosphate | NS                                   | 12711.<br>4      | 2293.1           | 16082.2            | 2              | 0.34                   | 9268.4             | 1060.5           | -0.46                  | 8768.6             | 1527.6           | -0.54                  |
| Xanthine                | NS                                   | 1790.1<br>880474 | 322.1<br>187243  | 2412.0<br>635084.  | 300.5<br>61809 | 0.43                   | 1908.3<br>696001.  | 246.8<br>129017  | 0.09                   | 1213.7<br>561178.  | 278.2<br>80031.  | -0.56                  |
| Oleoylcarnitine         | NS                                   | 21790.<br>.2     | .3               | 0                  | .5             | -0.47                  | 8                  | .9               | -0.34                  | 5                  | 6                | -0.65                  |
| Guanine                 | NS                                   | 5<br>35943.      | 3118.8           | 38735.9            | 1              | 0.83                   | 30250.4            | 2640.7           | 0.47                   | 26524.8            | 3980.4           | 0.28                   |
| Glycerophosphocholine   | NS                                   | 1<br>444579      | 5562.7<br>66593. | 40520.8<br>619195. | 2<br>43615     | 0.17                   | 31019.4<br>483581. | 3562.0<br>48128. | -0.21                  | 31440.1<br>427951. | 2064.6<br>57221. | -0.19                  |
| Acetylcarnitine         | NS                                   | .4<br>10953.     | 2                | 5                  | .0             | 0.48                   | 8                  | 3                | 0.12                   | 7                  | 8                | -0.05                  |
| Octanoylcarnitine       | NS                                   | 3<br>51613.      | 4141.8<br>14881. | 7225.8             | 4              | -0.60                  | 2828.9             | 928.0            | -1.95                  | 2909.3             | 1096.0           | -1.91                  |
| Arginine                | NS                                   | 9<br>460510      | 1<br>61692.      | 52396.9<br>663427. | 3<br>56530     | 0.02                   | 38449.5<br>563573. | 3930.6<br>59474. | -0.42                  | 37708.6<br>502590. | 6882.5<br>66467. | -0.45                  |
| Carnitine               | NS                                   | .3               | 9                | 0                  | .7             | 0.53                   | 4                  | 0                | 0.29                   | 5                  | 6                | 0.13                   |



|                                |         |   |        |        |         |       |       |         |        |       |         |        |       |
|--------------------------------|---------|---|--------|--------|---------|-------|-------|---------|--------|-------|---------|--------|-------|
| N6,N6,N6-Trimethyl-L-lysine    | 0.03495 | 4 | 3643.6 | 864.0  | 6207.1  | 838.0 | 0.77  | 2821.3  | 425.5  | -0.37 | 2840.7  | 473.1  | -0.36 |
| Taurine (pos mode)             | 0.04700 | 4 | 279999 | 40694. | 546149. | 38444 |       | 463462. | 54990. |       | 390713. | 50002. |       |
| Cytidine                       | NS      | 4 | .8     | 7      | 4       | .0    | 0.96  | 5       | 9      | 0.73  | 3       | 9      | 0.48  |
| Alpha-linolenic acid           | NS      |   | 29235. | 15451. |         | 4365. |       |         |        |       |         | 20737. |       |
| Inosine                        | 0.04700 | 4 | 10669. | 1097.2 | 23209.4 | 3     | 1.12  | 20455.9 | 1219.6 | 0.94  | 19845.9 | 2304.9 | 0.90  |
| Hypoxanthine                   | 0.03495 | 4 | 3451.6 | 84.5   | 7715.2  | 7     | 1.16  | 9067.3  | 616.7  | 1.39  | 8695.3  | 1247.1 | 1.33  |
| AMP                            | 0.01848 | 3 | 11329. | 2854.1 | 8327.9  | 9     | -0.44 | 1166.5  | 565.9  | -3.28 | 3102.9  | 848.4  | -1.87 |
| Hexanoylcarnitine              | NS      |   | 49080. | 17361. |         | 3472. |       |         |        |       |         |        |       |
| Niacinamide                    | NS      |   | 4      | 5      | 33072.8 | 7     | -0.57 | 17241.2 | 2294.1 | -1.51 | 18579.6 | 3495.3 | -1.40 |
| Pipecolic acid                 | NS      |   | 130131 | 15502. | 185345. | 15701 |       | 160267. | 18713. |       | 159570. | 25398. |       |
| Docosapentaenoic acid          | NS      |   | .7     | 3      | 3       | .7    | 0.51  | 8       | 3      | 0.30  | 5       | 2      | 0.29  |
| Glutathione reduced (pos mode) | NS      |   | 17673. |        |         |       |       |         |        |       |         |        |       |
| Citric acid                    | NS      |   | 4      | 3741.7 | 20178.3 | 607.7 | 0.19  | 14099.4 | 1094.3 | -0.33 | 13441.3 | 1812.2 | -0.39 |
| Erythronic acid                | NS      |   | 29721. |        |         | 3801. |       |         |        |       |         |        |       |
| Eicosapentaenoic acid          | NS      |   | 6      | 4233.6 | 27896.1 | 9     | -0.09 | 37569.7 | 5206.1 | 0.34  | 32337.8 | 5427.6 | 0.12  |
| Histidine                      | NS      |   | 350969 | 78587. | 260478. | 67222 |       | 275295. | 34504. |       | 279948. | 38067. |       |
|                                | NS      |   | .0     | 5      | 7       | .0    | -0.43 | 1       | 9      | -0.35 | 3       | 5      | -0.33 |
|                                | NS      |   | 74318. |        |         | 9930. |       |         |        |       |         |        |       |
|                                | NS      |   | 7      | 5642.2 | 90007.2 | 8     | 0.28  | 75753.5 | 4435.8 | 0.03  | 79744.6 | 6437.7 | 0.10  |
|                                | NS      |   | 32406. |        |         | 18416 |       |         |        |       |         |        |       |
|                                | NS      |   | 9      | 2649.0 | 66248.1 | .4    | 1.03  | 60545.4 | 7272.9 | 0.90  | 57413.7 | 7141.0 | 0.83  |
|                                | NS      |   | 66574. | 38254. |         | 3164. |       |         |        |       |         | 24568. |       |
|                                | NS      |   | 3      | 8      | 17117.7 | 0     | -1.96 | 30518.4 | 5018.1 | -1.13 | 78187.3 | 8      | 0.23  |
|                                | NS      |   | 7455.0 | 1231.1 | 9866.7  | 985.3 | 0.40  | 8298.5  | 209.2  | 0.15  | 9405.3  | 1169.1 | 0.34  |

|                                      |         |              |              |              |             |       |               |             |        |               |              |        |      |
|--------------------------------------|---------|--------------|--------------|--------------|-------------|-------|---------------|-------------|--------|---------------|--------------|--------|------|
| Lactic acid                          | NS      | 24494.<br>8  | 4281.2       | 26659.9      | 2865.<br>2  | 0.12  | 27337.2       | 1330.5      | 0.16   | 26267.5       | 1785.7       | 0.10   |      |
| Uric acid                            | NS      | 19283.<br>1  | 2388.2       | 24646.0      | 3558.<br>3  | 0.35  | 24301.1       | 1027.8      | 0.33   | 28991.6       | 4144.1       | 0.59   |      |
| Taurine (neg<br>mode)                | 0.03495 | 915035<br>.4 | 101592<br>.7 | 151937       | 96903<br>.3 | 0.73  | 132217<br>4.2 | 28294.<br>0 | 0.53   | 133473<br>4.1 | 126689<br>.1 | 0.54   |      |
| ADP                                  | NS      | 885.0        | 286.2        | 2160.0       | 466.4       | 1.29  | 921.6         | 650.8       | 0.06   | 679.7         | 157.3        | -0.38  |      |
| Fructose-6-<br>phosphate             | 0.03495 | 4            | 9604.7       | 2661.3       | 11878.5     | 1     | 0.31          | 14202.3     | 1324.3 | 0.56          | 24074.8      | 3695.2 | 1.33 |
| Adenine                              | NS      | 1800.6       | 168.4        | 1322.2       | 273.0       | -0.45 | 1408.4        | 567.9       | -0.35  | 1379.4        | 326.7        | -0.38  |      |
| Succinate                            | NS      | 36225.<br>0  | 9525.7       | 32073.2      | 1           | -0.18 | 19177.7       | 1888.8      | -0.92  | 18427.0       | 1759.6       | -0.98  |      |
| Serine                               | NS      | 1105.4       | 157.1        | 966.8        | 182.7       | -0.19 | 576.6         | 232.0       | -0.94  | 787.1         | 126.0        | -0.49  |      |
| UMP                                  | 0.01848 | 18669.<br>3  | 3141.2       | 15371.0      | 1           | -0.28 | 4745.0        | 914.3       | -1.98  | 6654.9        | 1411.7       | -1.49  |      |
| Ribulose-5-<br>phosphate             | NS      | 7            | 5786.0       | 1753.5       | 11940.7     | 7     | 1.05          | 8735.4      | 3040.5 | 0.59          | 13520.6      | 953.6  | 1.22 |
| Malic acid                           | NS      | 136466<br>.6 | 14156.<br>0  | 172923.<br>6 | 24079<br>.7 | 0.34  | 194287.<br>8  | 8374.7      | 0.51   | 198400.<br>9  | 15329.<br>4  | 0.54   |      |
| Arachidonic acid                     | 0.01848 | 189095<br>3  | 25128.<br>.7 | 114019.<br>8 | 14514<br>.8 | -0.73 | 302586.<br>2  | 27883.<br>9 | 0.68   | 292959.<br>5  | 42535.<br>1  | 0.63   |      |
| Glutathione<br>reduced (neg<br>mode) | NS      | 224876<br>.4 | 73221.<br>5  | 59342.4      | 23825<br>.5 | -1.92 | 85187.8       | 25380.<br>9 | -1.40  | 114015.<br>9  | 35034.<br>3  | -0.98  |      |

**Supplementary Table S5.**

Month 4 results.

| Metabolite              | FDR<br>corrected<br>ANOVA<br>p-value | Control - 4m   |                | Gamma - 4m     |                | Log2<br>Fold<br>Change | Fe - 4m        |                | Log2<br>Fold<br>Change | O - 4m         |                | Log2<br>Fold<br>Change |
|-------------------------|--------------------------------------|----------------|----------------|----------------|----------------|------------------------|----------------|----------------|------------------------|----------------|----------------|------------------------|
|                         |                                      | Mean           | SEM            | Mean           | SEM            |                        | Mean           | SEM            |                        | Mean           | SEM            |                        |
| Docosahexaenoic acid    | NS                                   | 83220.5<br>211 | 5282.36<br>616 | 87843.4<br>753 | 5626.61<br>268 | 0.08                   | 65988.7<br>941 | 3461.67<br>659 | -0.33                  | 102403.<br>619 | 16613.8<br>353 | 0.3                    |
| Phenylalanine           | 0.02049<br>7                         | 77998.2<br>084 | 10233.5<br>909 | 91603.9<br>984 | 5809.72<br>602 | 0.23                   | 66590.7<br>412 | 6000.57<br>596 | -0.23                  | 110136.<br>978 | 9624.95<br>615 | 0.5                    |
| Guanosine monophosphate | NS                                   | 11400.1<br>295 | 1317.02<br>495 | 13160.6<br>505 | 1543.44<br>487 | 0.21                   | 13211.3<br>725 | 2128.33<br>887 | 0.21                   | 12845.8<br>841 | 3244.99<br>861 | 0.17                   |
| Xanthine                | NS                                   | 1551.48<br>631 | 174.986<br>997 | 2105.26<br>476 | 161.034<br>915 | 0.44                   | 1884.08<br>975 | 179.515<br>629 | 0.28                   | 3226.16<br>506 | 788.888<br>735 | 1.06                   |
| Oleoylcarnitine         | NS                                   | 676918.<br>137 | 96541.5<br>121 | 842719.<br>058 | 42518.1<br>19  | 0.32                   | 102207<br>2.53 | 64999.3<br>669 | 0.59                   | 815363.<br>145 | 94841.3<br>436 | 0.27                   |
| Guanine                 | NS                                   | 30420.6<br>108 | 2127.04<br>118 | 32591.6<br>58  | 1912.99<br>443 | 0.1                    | 28605.3<br>843 | 2950.92<br>425 | -0.09                  | 60722.5<br>877 | 23446.7<br>012 | 1                      |
| Glycerophosphocholine   | 0.00866<br>23                        | 30462.8<br>519 | 670.977<br>912 | 43548.9<br>778 | 3899.40<br>123 | 0.52                   | 43315.0<br>723 | 2272.96<br>441 | 0.51                   | 54749.8<br>832 | 5720.27<br>039 | 0.85                   |
| Acetylcarnitine         | 0.00866<br>23                        | 412302.<br>475 | 40777.9<br>184 | 457741.<br>106 | 23886.1<br>341 | 0.15                   | 451325.<br>112 | 25411.3<br>587 | 0.13                   | 633304.<br>537 | 48562.6<br>236 | 0.62                   |
| Octanoylcarnitine       | 0.02998<br>3                         | 2172.37<br>894 | 518.646<br>201 | 3471.47<br>913 | 227.942<br>689 | 0.68                   | 8948.83<br>036 | 2086.07<br>17  | 2.04                   | 7359.51<br>703 | 2092.69<br>279 | 1.76                   |
| Arginine                | 0.00866<br>23                        | 45364.3<br>48  | 4555.64<br>632 | 52015.7<br>616 | 1850.00<br>692 | 0.2                    | 41069.8<br>555 | 915.888<br>789 | -0.14                  | 62284.7<br>285 | 4637.87<br>633 | 0.46                   |

|                                      |                |                |                |                |                |       |                |                |       |                |                |      |
|--------------------------------------|----------------|----------------|----------------|----------------|----------------|-------|----------------|----------------|-------|----------------|----------------|------|
| Carnitine                            | 0.01643<br>6   | 525494.<br>083 | 50427.2<br>669 | 567367.<br>895 | 28012.8<br>982 | 0.11  | 480750.<br>582 | 31274.0<br>114 | -0.13 | 753574.<br>985 | 73999.0<br>741 | 0.52 |
| N6,N6,N6-<br>Trimethyl-L-<br>lysine  | 0.01643<br>6   | 2540.37<br>322 | 401.108<br>182 | 5160.57<br>173 | 747.363<br>832 | 1.02  | 3099.27<br>589 | 171.973<br>754 | 0.29  | 5051.62<br>864 | 723.992<br>599 | 0.99 |
| Taurine (pos<br>mode)                | 0.01643<br>6   | 402441.<br>089 | 35764.0<br>666 | 415838.<br>628 | 15599.5<br>25  | 0.05  | 364414.<br>372 | 30997.7<br>974 | -0.14 | 543415.<br>456 | 42114.2<br>156 | 0.43 |
| Cytidine                             | 0.00571<br>63  | 382.549<br>522 | 178.119<br>845 | 1597.29<br>51  | 281.185<br>363 | 2.06  | 98.6925<br>345 | 94.4683<br>557 | -1.95 | 834.954<br>773 | 253.549<br>313 | 1.13 |
| Alpha-linolenic<br>acid              | NS             | 40054.9<br>242 | 10486.6<br>706 | 22694.4<br>163 | 4524.04<br>398 | -0.82 | 33266.2<br>214 | 9802.28<br>445 | -0.27 | 40865.6<br>152 | 12943.7<br>613 | 0.03 |
| Inosine                              | NS             | 19747.5<br>252 | 1358.21<br>958 | 42061.5<br>211 | 2732.18<br>636 | 1.09  | 19498.0<br>789 | 1399.74<br>052 | -0.02 | 42604.1<br>997 | 14823.2<br>341 | 1.11 |
| Hypoxanthine                         | 0.01158<br>5   | 9678.60<br>267 | 683.238<br>408 | 11370.6<br>042 | 1044.45<br>28  | 0.23  | 5726.59<br>494 | 371.975<br>248 | -0.76 | 11961.0<br>331 | 1731.66<br>338 | 0.31 |
| AMP                                  | 0.00743<br>68  | 1913.29<br>695 | 422.718<br>358 | 1306.44<br>14  | 461.976<br>836 | -0.55 | 6552.48<br>477 | 575.169<br>661 | 1.78  | 6315.52<br>461 | 1747.74<br>128 | 1.72 |
| Hexanoylcarniti<br>ne                | 0.00438<br>65  | 14292.6<br>193 | 2102.74<br>628 | 17840.8<br>582 | 2176.31<br>746 | 0.32  | 30200.4<br>579 | 4836.77<br>684 | 1.08  | 38585.5<br>16  | 4118.77<br>203 | 1.43 |
| Niacinamide                          | 0.01158<br>5   | 157301.<br>033 | 16964.6<br>111 | 170265.<br>251 | 9122.78<br>016 | 0.11  | 158598.<br>682 | 8719.76<br>129 | 0.01  | 236910.<br>847 | 20472.6<br>65  | 0.59 |
| Pipecolic acid                       | 0.00709<br>26  | 15157.4<br>799 | 1192.84<br>045 | 17333.5<br>191 | 1079.86<br>406 | 0.19  | 15723.9<br>677 | 760.941<br>364 | 0.05  | 23697.9<br>63  | 1995.11<br>106 | 0.64 |
| Docosapentaenoi<br>c acid            | NS             | 49979.5<br>677 | 6865.30<br>757 | 59939.5<br>763 | 3537.27<br>676 | 0.26  | 42788.3<br>172 | 1486.15<br>803 | -0.22 | 61547.3<br>356 | 12407.9<br>195 | 0.3  |
| Glutathione<br>reduced (pos<br>mode) | 0.00031<br>387 | 28913.3<br>445 | 13804.2<br>319 | 392387.<br>696 | 21319.3<br>7   | 3.76  | 156617.<br>346 | 30896.1<br>051 | 2.44  | 134565.<br>349 | 56066.2<br>639 | 2.22 |
| Citric acid                          | NS             | 85574.2<br>691 | 9381.84<br>345 | 70803.3<br>673 | 4492.27<br>005 | -0.27 | 72372.1<br>362 | 7382.88<br>669 | -0.24 | 92208.0<br>771 | 7999.25<br>407 | 0.11 |

|                         |                |                |                |                |                |       |                |                |       |                |                |       |
|-------------------------|----------------|----------------|----------------|----------------|----------------|-------|----------------|----------------|-------|----------------|----------------|-------|
| Erythronic acid         | NS             | 84287.0<br>549 | 10903.7<br>487 | 53782.0<br>213 | 4227.18<br>288 | -0.65 | 55424.2<br>037 | 8234.15<br>267 | -0.6  | 73591.7<br>828 | 16052.8<br>436 | -0.2  |
| Eicosapentaenoic acid   | NS             | 42444.1<br>633 | 5173.53<br>217 | 41120.5<br>949 | 3152.24<br>115 | -0.05 | 37357.9<br>509 | 4559.01<br>458 | -0.18 | 63227.6<br>546 | 19642.6<br>086 | 0.57  |
| Histidine               | 0.00866<br>23  | 8082.07<br>461 | 1062.60<br>01  | 6988.03<br>332 | 417.171<br>455 | -0.21 | 7591.11<br>488 | 449.471<br>05  | -0.09 | 11115.4<br>604 | 492.376<br>137 | 0.46  |
| Lactic acid             | 0.02121<br>5   | 21087.3<br>988 | 2431.98<br>058 | 22725.6<br>081 | 658.115<br>526 | 0.11  | 22718.7<br>484 | 953.399<br>188 | 0.11  | 30127.4<br>774 | 2344.47<br>467 | 0.51  |
| Uric acid               | 0.01643<br>6   | 21226.7<br>752 | 2016.76<br>096 | 17854.9<br>249 | 1068.19<br>287 | -0.25 | 21744.8<br>84  | 854.011<br>824 | 0.03  | 28923.2<br>099 | 3023.86<br>297 | 0.45  |
| Taurine (negative mode) | NS             | 125890<br>5.05 | 166617.<br>515 | 117484<br>6.53 | 51228.5<br>323 | -0.1  | 116961<br>3.62 | 112105.<br>529 | -0.11 | 160531<br>9.39 | 53638.1<br>539 | 0.35  |
| ADP                     | 0.01363<br>9   | 2961.90<br>496 | 1008.32<br>821 | 731.146<br>328 | 188.403<br>409 | -2.02 | 550.082<br>347 | 185.477<br>138 | -2.43 | 0<br>0         | 0<br>0         | -     |
| Fructose-6-phosphate    | 0.00279<br>38  | 28073.0<br>115 | 4024.04<br>919 | 19509.7<br>942 | 1457.51<br>756 | -0.52 | 9327.01<br>321 | 454.783<br>463 | -1.59 | 21446.8<br>734 | 1524.15<br>571 | -0.39 |
| Adenine                 | NS             | 2224.02<br>317 | 505.042<br>813 | 1403.29<br>08  | 299.622<br>802 | -0.66 | 1693.34<br>728 | 453.197<br>23  | -0.39 | 1480.43<br>439 | 252.176<br>793 | -0.59 |
| Succinate               | 0.00031<br>387 | 20186.7<br>123 | 3293.14<br>986 | 36207.4<br>226 | 1832.53<br>938 | 0.84  | 40001.2<br>153 | 3063.78<br>936 | 0.99  | 50547.1<br>065 | 3113.59<br>904 | 1.32  |
| Serine                  | NS             | 1078.75<br>046 | 158.690<br>403 | 722.384<br>179 | 200.059<br>461 | -0.58 | 567.971<br>158 | 119.151<br>362 | -0.93 | 929.781<br>925 | 153.873<br>792 | -0.21 |
| UMP                     | NS             | 10157.3<br>694 | 1519.13<br>036 | 5939.91<br>469 | 814.633<br>188 | -0.77 | 11612.2<br>773 | 634.439<br>067 | 0.19  | 14448.8<br>454 | 3978.98<br>061 | 0.51  |
| Ribulose-5-phosphate    | 0.00265<br>23  | 6833.00<br>263 | 1382.58<br>997 | 4784.91<br>374 | 231.275<br>36  | -0.51 | 5845.83<br>444 | 973.600<br>947 | -0.23 | 15122.6<br>203 | 2083.71<br>996 | 1.15  |
| Malic acid              | 0.02902<br>8   | 152876.<br>851 | 20662.0<br>645 | 126612.<br>129 | 5667.62<br>212 | -0.27 | 103052.<br>784 | 7001.55<br>282 | -0.57 | 160608.<br>678 | 9518.04<br>724 | 0.07  |
| Arachidonic acid        | NS             | 240508.<br>014 | 27756.8<br>279 | 295576.<br>775 | 21965.7<br>194 | 0.3   | 197969.<br>044 | 8503.44<br>89  | -0.28 | 292123.<br>44  | 48978.0<br>738 | 0.28  |

|                                      |              |               |                |                |                |      |                |                |      |                |                |      |
|--------------------------------------|--------------|---------------|----------------|----------------|----------------|------|----------------|----------------|------|----------------|----------------|------|
| Glutathione<br>reduced (neg<br>mode) | 0.02267<br>5 | 8774.62<br>52 | 6291.74<br>383 | 99966.6<br>296 | 12326.3<br>626 | 3.51 | 66982.1<br>543 | 18026.5<br>653 | 2.93 | 43707.6<br>598 | 25842.4<br>085 | 2.32 |
|--------------------------------------|--------------|---------------|----------------|----------------|----------------|------|----------------|----------------|------|----------------|----------------|------|
